# Supplementary material for: A striatal interneuron circuit for continuous target pursuit
Source: PubMed Central journal article supplement (PMC6586681; doi:10.1038/s41467-019-10716-w), 2019-06-20
Supplement: 41467_2019_10716_MOESM2_ESM.pdf [file 41467_2019_10716_MOESM2_ESM.pdf]

## **Description of Additional Supplementary Files**

File Name: Supplementary Movie 1

Description: Representative 3D motion capture of a mouse during pursuit behavior (following).

File Name: Supplementary Movie 2

Description: Representative 3D motion capture of a mouse that is not following the target (same mouse as in Supplementary Movie 1).

File Name: Supplementary Movie 3

Description: Representative calcium imaging signals using the UCLA Miniscope.
